# Supplementary material
Source: MDPI journal article supplement (https://www.mdpi.com/2073-4441/14/6/894)
Supplement: s1 [file s1]

---

# Remediation of Chromium (VI) from Groundwater by Metal-Based Biochar under Anaerobic Conditions

Yating Jiang <sup>1</sup>, Min Dai <sup>2</sup>, Fei Yang <sup>1</sup>, Imran Ali <sup>3,\*</sup>, Iffat Naz <sup>4,\*</sup> and Changsheng Peng <sup>1,2,\*</sup>

<sup>1</sup> The Key Lab of Marine Environmental Science and Ecology, Ministry of Education, Department of Environmental Engineering, Ocean University of China, Qingdao 266100, China; jiang1260245363@163.com (Y.J.); yfgarfee@126.com (F.Y.)

<sup>2</sup> Guangdong Provincial Key Laboratory of Environmental Health and Land Resource, Department of Environmental Engineering, Zhaoqing University, Zhaoqing 526061, China; daimin1007@163.com (M.D.)

<sup>3</sup> Department of Environmental Science and Engineering, College of Chemistry and Environmental Engineering, Shenzhen University, Shenzhen 518060, China

<sup>4</sup> Department of Biology, Science Unit, Deanship of Educational Services, Qassim University, Buraidah 51452, Saudi Arabia

\* Correspondence: imranali@szu.edu.cn (I.A.); I.Majid@qu.edu.sa (I.N.); pcs005@sohu.com (C.P.)

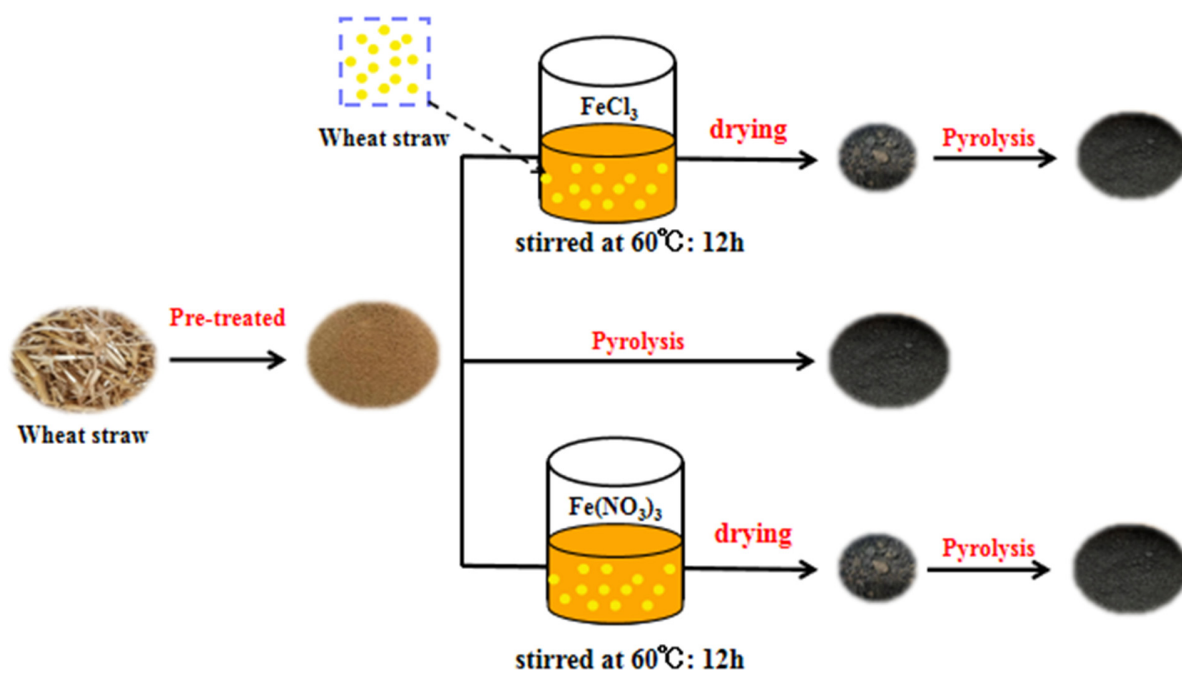

**Figure S1.** Schematic diagram of preparation of BC, FeCl<sub>3</sub>@BC and Fe(NO<sub>3</sub>)<sub>3</sub>@BC.

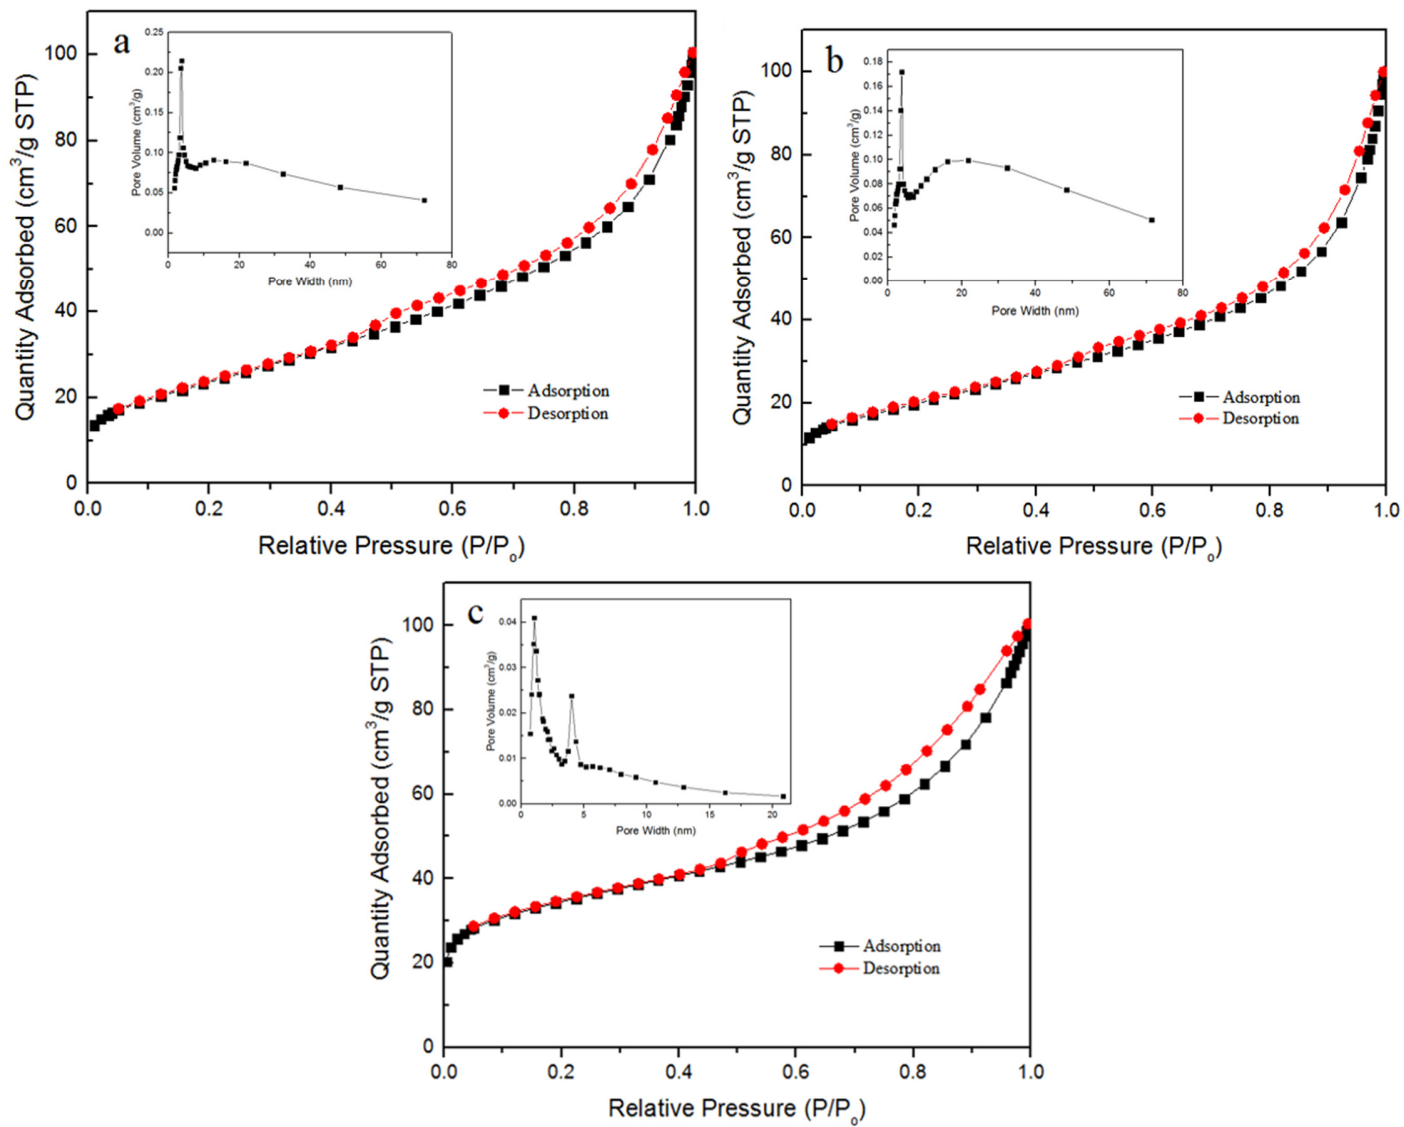

**Figure S2.** N<sub>2</sub> adsorption-desorption isotherm for BC (a), FeCl<sub>3</sub>@BC (b) and Fe(NO<sub>3</sub>)<sub>3</sub>@BC (c).

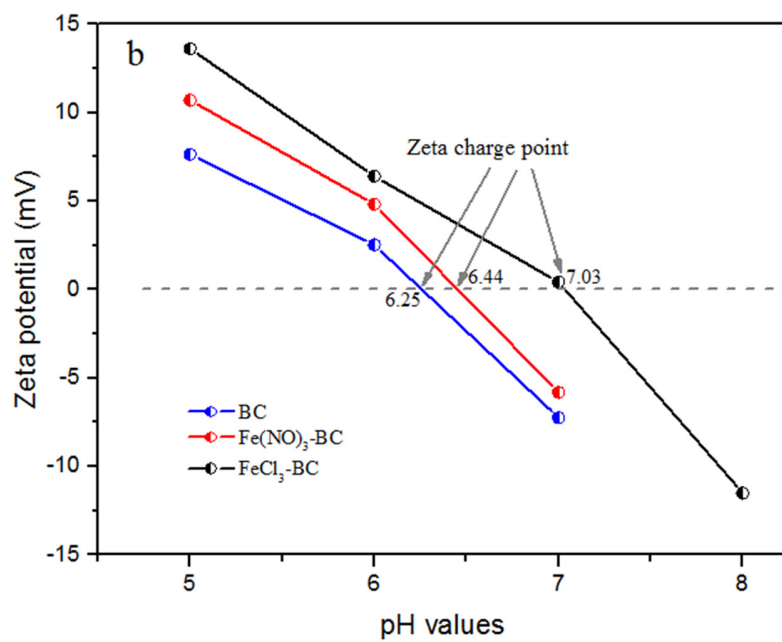

**Figure S3.** Change of zeta potential of BC,  $\text{FeCl}_3\text{@BC}$  and  $\text{Fe}(\text{NO}_3)_3\text{@BC}$ .

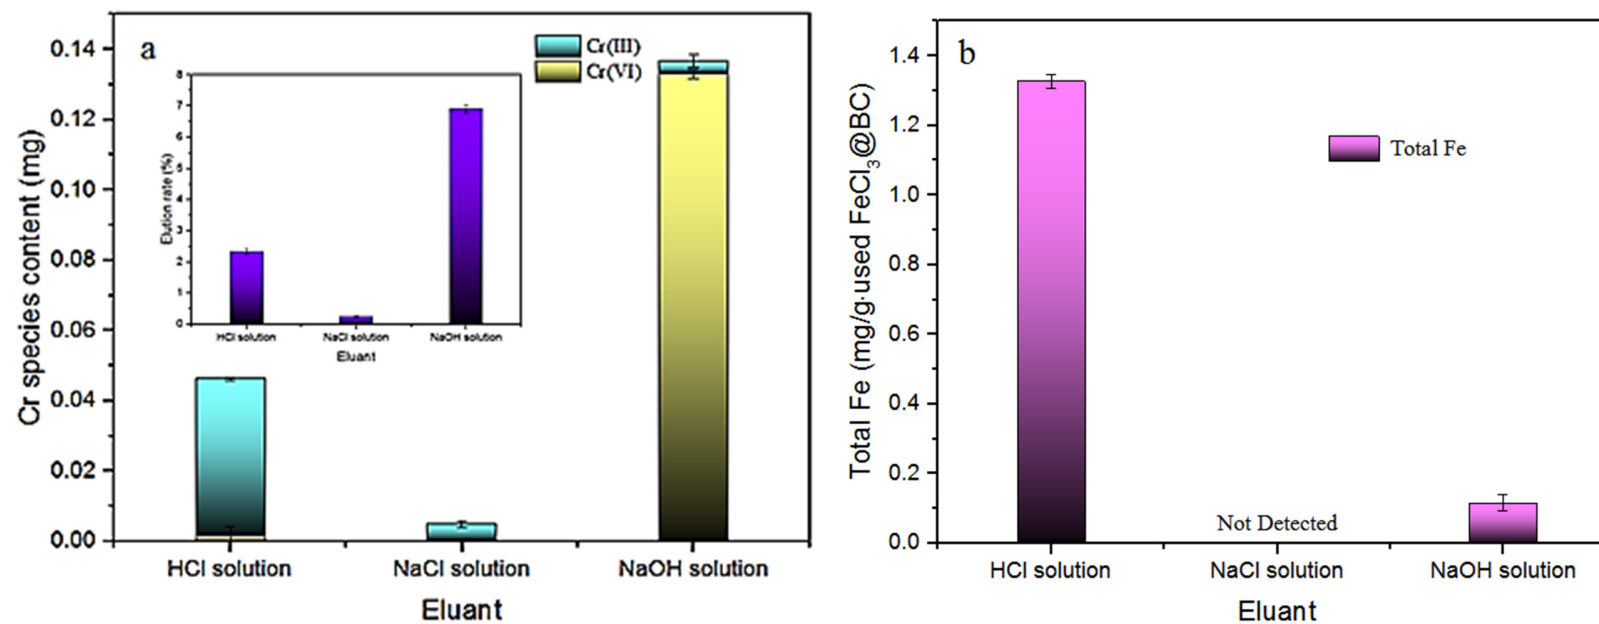

**Figure S4.** (a) The Cr species content (Cr(VI) and Cr(III), respectively) in solution and distinct elution rates (the inset), (b) the leaching total Fe content after elution under three eluants with different acidity and alkalinity.

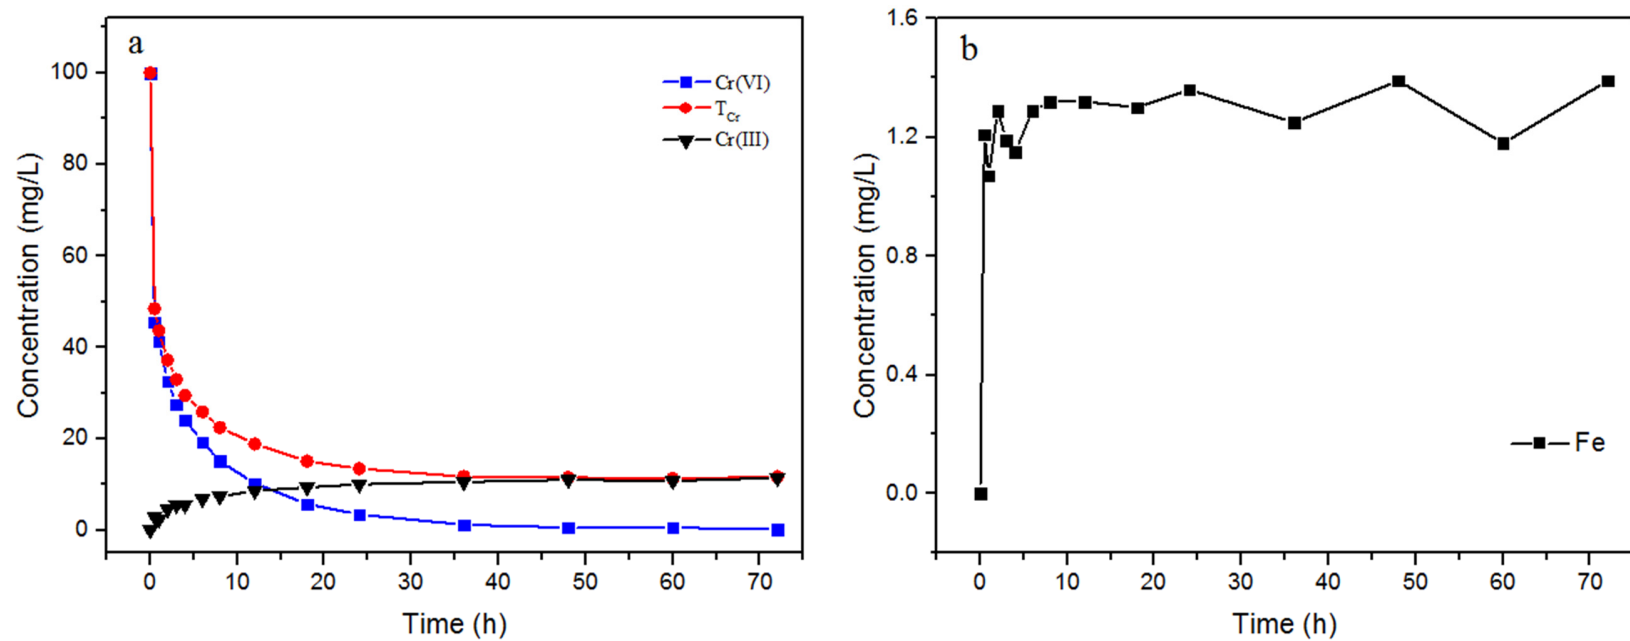

**Figure S5.** (a) The variance of  $T_{Cr}$  and Cr(VI) concentrations, (b) The variance of dissolved Fe concentration.

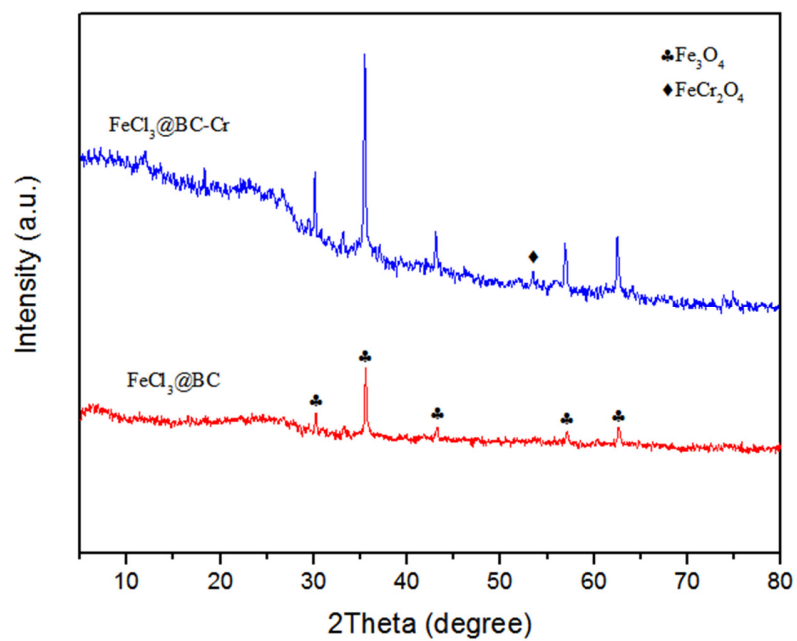

**Figure S6.** XRD spectra before and after the reaction of  $\text{FeCl}_3\text{@BC}$  with  $\text{Cr(VI)}$ .
